# Supplementary material for: Mechanism of Colorectal Cancer Development under Exposure to Synthetic Phenolic Antioxidants Based on Network Toxicology and Molecular Docking
Source: Research Square preprint supplement (doi:10.21203/rs.3.rs-7207120/v1), 2025-08-25
Supplement: Supplementary file 1 [file b1d19563d59e778144af2fe7.xlsx]

## Sheet: Sheet1
Name	Abbreviation	CAS	Molecular Formulas	M.W. molecular weights (g/mol)	Smiles	Carcinogenicity（ADMET lab 3.0 ）
Pentaerythritol tetrakis(3-(3,5-di-tert-butyl-4-hydroxyphenyl) propionate)	AO1010	6683-19-8	C73H108O12	1177.66	CC(C)(C)C1=CC(=CC(=C1O)C(C)(C)C)CCC(=O)OCC(COC(=O)CCC2=CC(=C(C(=C2)C(C)(C)C)O)C(C)(C)C)(COC(=O)CCC3=CC(=C(C(=C3)C(C)(C)C)O)C(C)(C)C)COC(=O)CCC4=CC(=C(C(=C4)C(C)(C)C)O)C(C)(C)C	0.012
N,N'-bis[3-(3,5-di-tert-butyl-4-hydroxyphenyl)propionyl]hydrazine	AO1024	32687-78-8	C34H52N2O4	552.79	CC(C)(C)C1=CC(=CC(=C1O)C(C)(C)C)CCC(=O)NNC(=O)CCC2=CC(=C(C(=C2)C(C)(C)C)O)C(C)(C)C	0.026
3,5-bis(1,1-dimethylethyl)-4-hydroxybenzenepropanoic acid thiodi-2,1-ethanediyl ester	AO1035	41484-35-9	C38H58O6S	642.94	CC(C)(C)C1=CC(=CC(=C1O)C(C)(C)C)CCC(=O)OCCSCCOC(=O)CCC2=CC(=C(C(=C2)C(C)(C)C)O)C(C)(C)C	0.082
Octadecyl 3-(3,5-di-tert-butyl-4-hydroxyphenyl) propionate	AO1076	2082-79-3	C35H62O3	530.86	CCCCCCCCCCCCCCCCCCOC(=O)CCC1=CC(=C(C(=C1)C(C)(C)C)O)C(C)(C)C	0.153
N,N'-hexane-1,6-diylbis[3-(3,5-di-tert-butyl-4-hydroxyphenylpropionamide]	AO1098	23128-74-7	C40H64N2O4	636.95	CC(C)(C)C1=CC(=CC(=C1O)C(C)(C)C)CCC(=O)NCCCCCCNC(=O)CCC2=CC(=C(C(=C2)C(C)(C)C)O)C(C)(C)C	0.022
Octyl-3-(3,5-di-tert-butyl-4-hydroxyphenyl)propionate	AO1135	125643-61-0	C25H42O3	390.6	CCCCCCCCCCCCCCCC1=CC(=CC=C1)OC(C)(C)C(=O)O	0.354
2,2'-methylenebis(6-tert-butyl-4-methyl-phenol)	AO2246	119-47-1	C23H32O2	340.51	CC1=CC(=C(C(=C1)C(C)(C)C)O)CC2=C(C(=CC(=C2)C)C(C)(C)C)O	0.201
1,2-Ethandiylbis(oxy-2,1-ethandiyl)-bis{3-[4-hydroxy-3-methyl-5-(2-methyl-2-propanyl)phenyl]propanoat}	AO245	36443-68-2	C34H50O8	586.756	CC1=CC(=CC(=C1O)C(C)(C)C)CCC(=O)OCCOCCOCCOC(=O)CCC2=CC(=C(C(=C2)C)O)C(C)(C)C	0.513
1,3,5-tris-[(3,5-di-tert-butyl-4-hydroxyphenyl)	AO3114	27676-62-6	C48H69N3O6	784.078	CC(C)(C)C1=CC(=CC(=C1O)C(C)(C)C)CN2C(=O)N(C(=O)N(C2=O)CC3=CC(=C(C(=C3)C(C)(C)C)O)C(C)(C)C)CC4=CC(=C(C(=C4)C(C)(C)C)O)C(C)(C)C	0.025
4,4'-Sulfanediylbis(2-tert-butyl-5-methylphenol)	AO-TBM6	96-69-5	C22H30O2S	358.537	CC1=CC(=C(C=C1SC2=CC(=C(C=C2C)O)C(C)(C)C)C(C)(C)C)O	0.26
Butylated Hydroxytoluene	BHT	128-37-0	C15H24O	220.18	CC1=CC(=C(C(=C1)C(C)(C)C)O)C(C)(C)C	0.224
3,5-di-tert-butyl-4-hydroxybenzaldehyde	BHT-CHO	1620-98-0	C15H22O2	234.33	CC(C)(C)C1=CC(=CC(=C1O)C(C)(C)C)C=O	0.231
3,5-di-tert-butyl-4-hydroxybenzoic acid	BHT-COOH	1421-49-4	C15H22O3	250.33	CC(C)(C)C1=CC(=CC(=C1O)C(C)(C)C)C(=O)O	0.199
2,6-di-tert-butyl-1,4-benzoquinone	BHT-Q	719-22-2	C14H20O2	220.31	CC(C)(C)C1=CC(=O)C=C(C1=O)C(C)(C)C	0.799
